# Supplementary material for: Atomically dispersed and oxygen deficient CuO clusters as an extremely efficient heterogeneous catalyst
Source: Royal Society of Chemistry journal article supplement (doi:10.1039/d1nr08011c), 2022-01-01
Supplement: d1nr08011c1.pdf [file d1nr08011c1.pdf]

## Supporting Information

### Atomically Dispersed and Oxygen Deficient CuO Clusters as Extremely Efficient Heterogeneous Catalyst

Tingshi Zhang, ‡<sup>a,b</sup> Chengkai Yang, ‡<sup>a,b</sup> Borong Li,<sup>a,b</sup> Yuanming Zhang,<sup>a,b</sup> Zanyong Zhuang\*<sup>a,b</sup> and YanYu<sup>\*a,b</sup>

<sup>a</sup>College of Materials Science and Engineering, Fuzhou University, New Campus, Minhou, Fujian 350108, China

<sup>b</sup>Key Laboratory of Advanced Materials Technologies, Fuzhou University, Fujian 350108, China

\*Corresponding author

E-mail: zyzhuang@fzu.edu.cn; yuyan@fzu.edu.cn.

(‡: These authors contributed equally to this work)

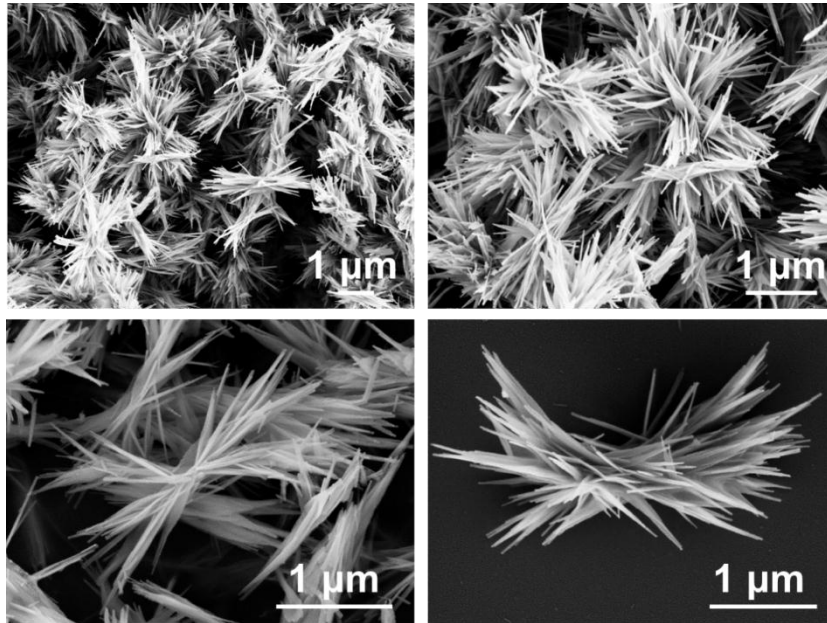

**Fig. S1.** The SEM images of CuO-AlOOH.

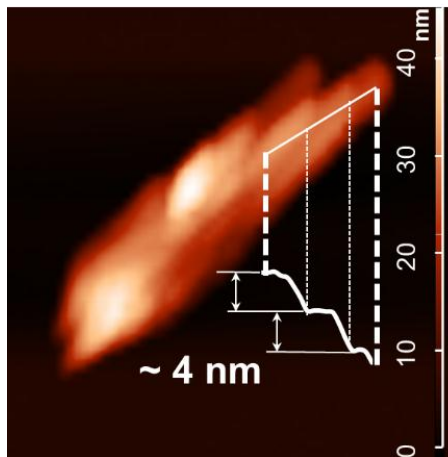

**Fig. S2.** (a, b) The XRD pattern and AFM image of CuO-AlOOH.

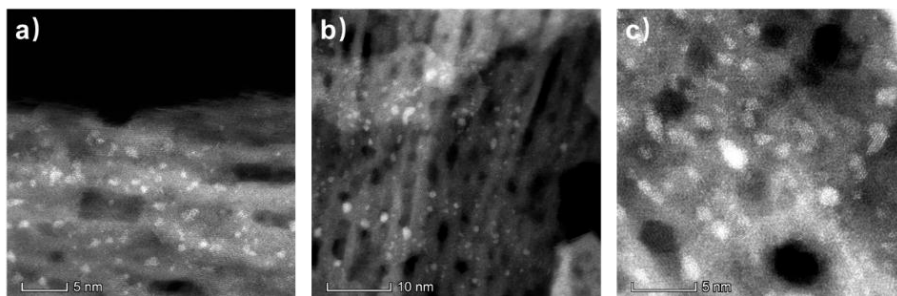

**Fig. S3.** The AC-TEM images of CuO-AlOOH.

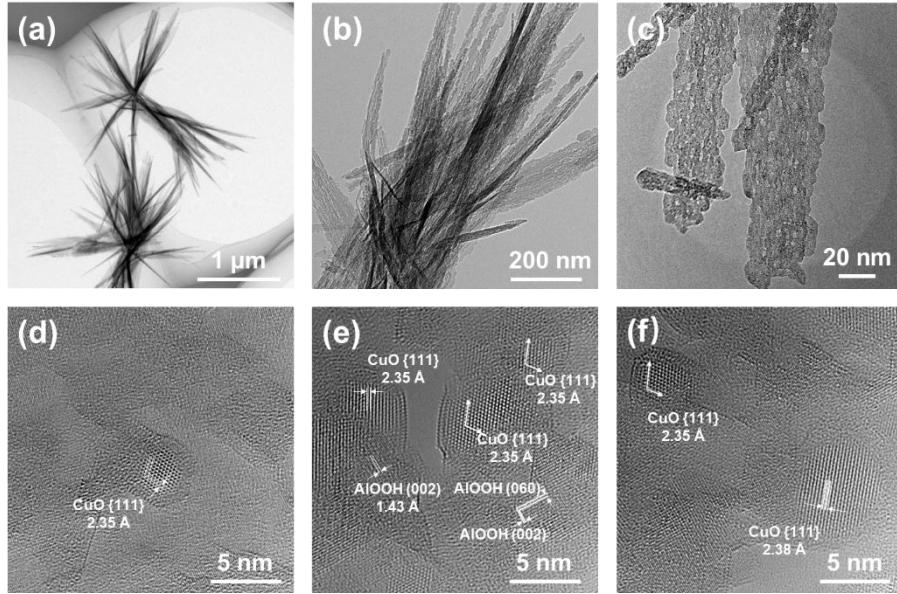

**Fig. S4.** The TEM images of CuO-AIOOH. These dots can be ascribed to CuO, displaying crossing lattice fringes with spacing of 0.235 nm and interfacial angle of about 70°, well matched the {111} facets of cubic CuO (JCPDS No.78-0428).

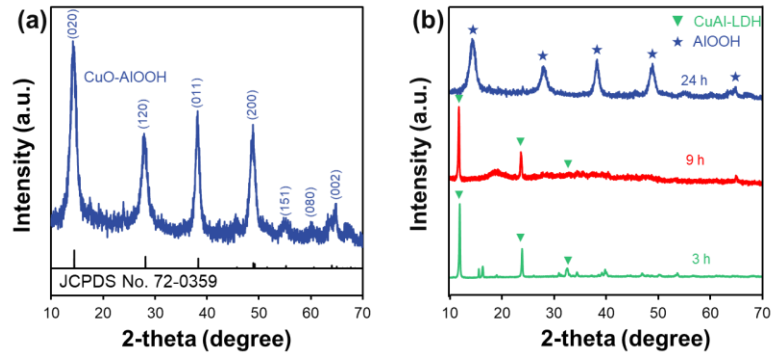

**Fig. S5.** (a) The XRD pattern of CuO-AIOOH, (b) XRD pattern of samples collected at different synthesis time.

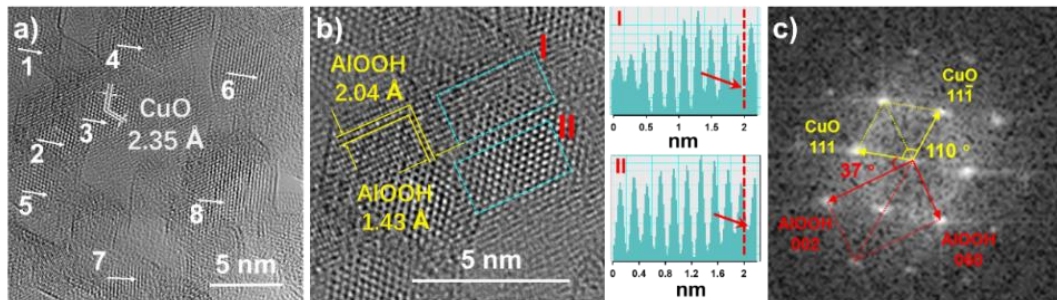

**Fig. S6.** a-b) HRTEM images of CuO-AIOOH, c) Fast Fourier transform (FFT) of the TEM image from a).

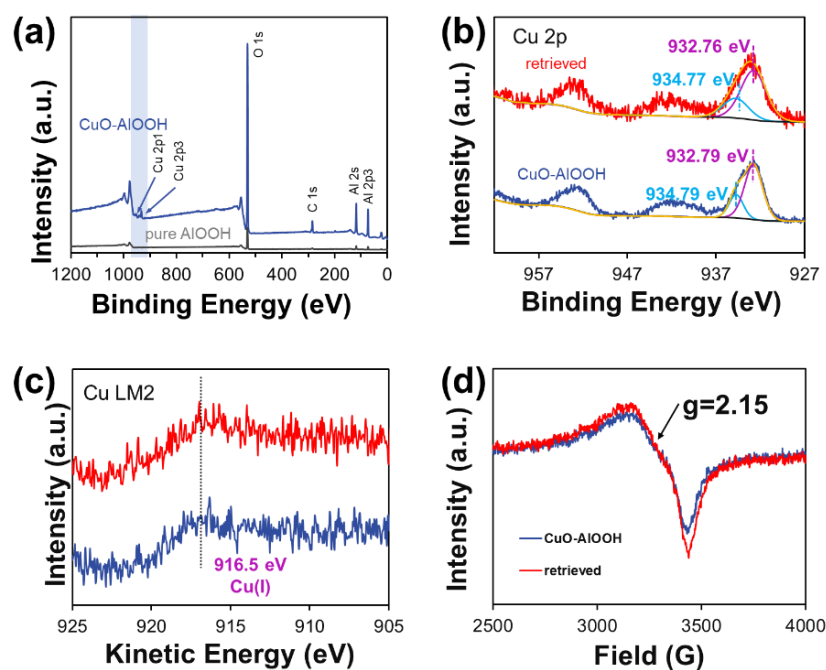

**Fig. S7.** (a) The XPS spectra of pure AIOOH and CuO-AIOOH, (b) Cu 2p XPS and (c) Cu LM2 spectra of CuO-AIOOH and retrieved CuO-AIOOH, (d) EPR spectra of CuO-AIOOH and retrieved CuO-AIOOH after catalytic reaction.

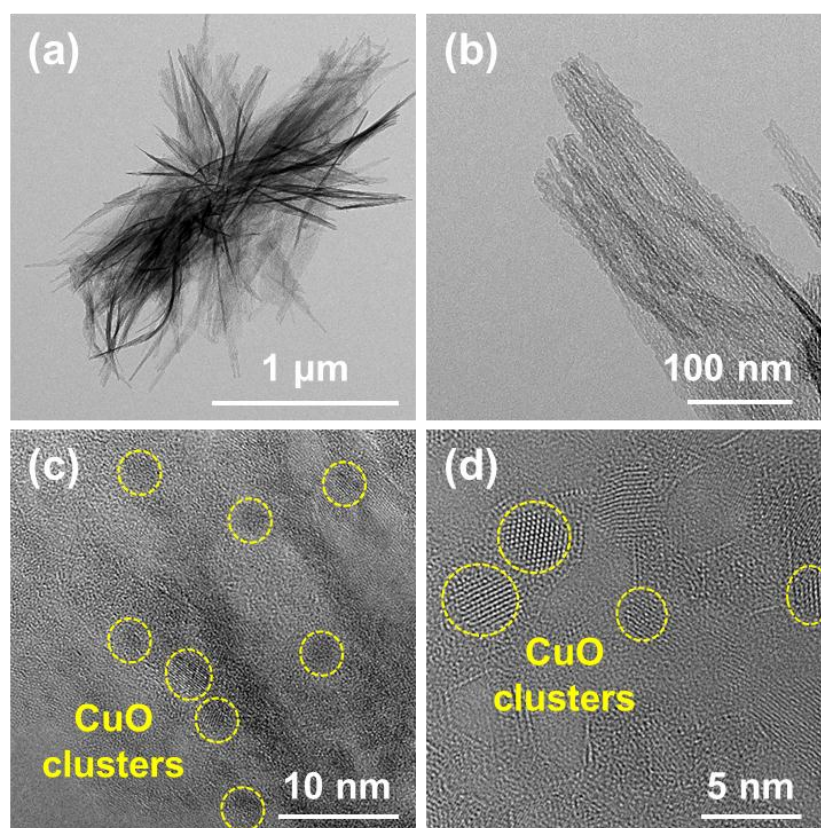

**Fig. S8.** TEM images of OV-s-poor CuO/AIOOH.

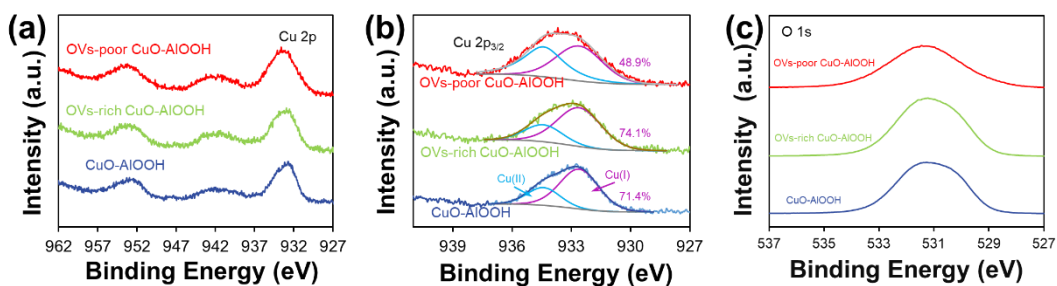

**Fig. S9.** (a, b) The Cu 2p, and (c) O1s XPS spectra spectra of CuO-AIOOH, OV-rich CuO-AIOOH, OV-poor CuO-AIOOH and mixture of CuO+AIOOH.

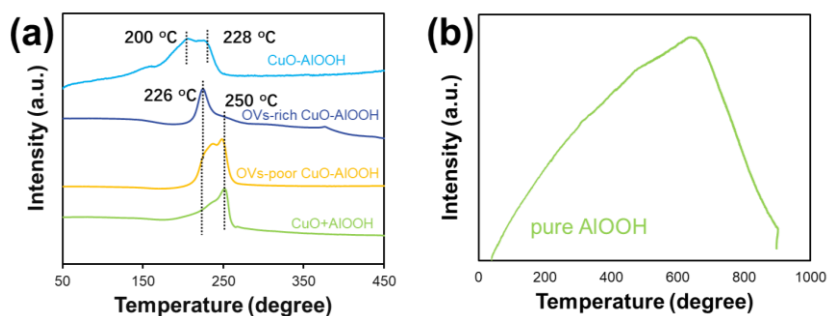

**Fig. S10.** H<sub>2</sub>-TPR profiles of crude CuO-AIOOH, OV-rich CuO-AIOOH, OV-poor CuO-AIOOH, and the CuO+AIOOH reference.

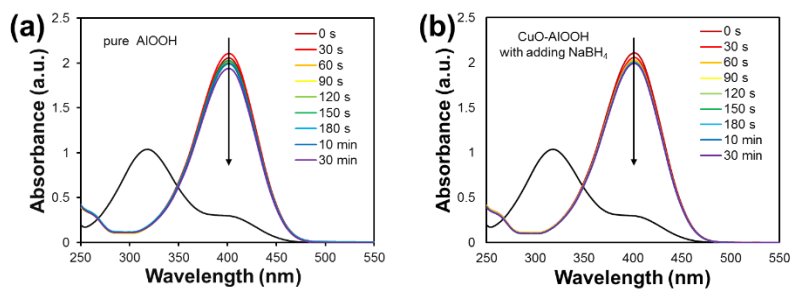

**Fig. S11.** Time-dependent UV-vis absorption spectra of 4-nitrophenol in presence of (a) pure AIOOH and (b) CuO-AIOOH without adding NaBH<sub>4</sub>, respectively.

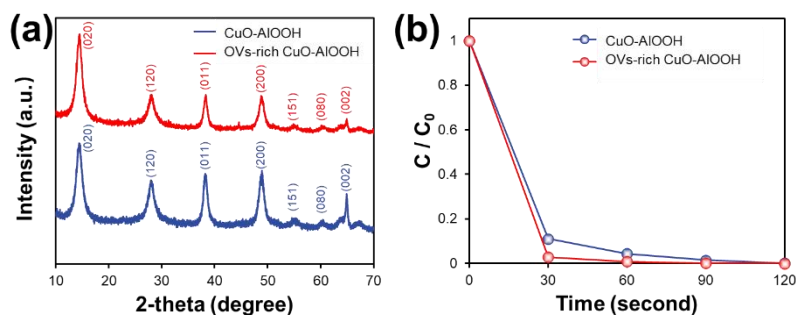

**Fig. S12.** (a) XRD patterns of CuO-AlOOH and CuO-AlOOH after annealed at 120 °C (denoted as OV-rich CuO-AlOOH). (b) The catalyst activity of 4-NP reduction by using the CuO-AlOOH and OV-rich CuO-AlOOH as the catalyst, respectively.

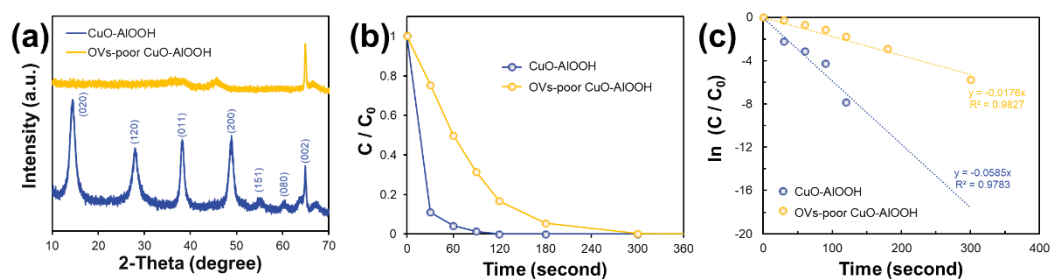

**Fig. S13.** (a) The XRD patterns of CuO-AlOOH and OV-poor CuO-AlOOH. (b) The catalytic activity of 4-NP reduction by using CuO-AlOOH and OV-poor CuO-AlOOH as catalyst, respectively. (c) Rate kinetics of 4-NP reduction by CuO-AlOOH and OV-poor CuO-AlOOH.

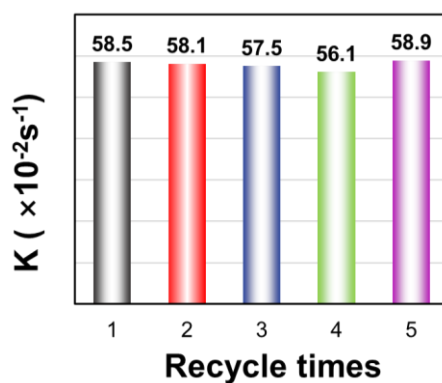

**Fig. S14.** Recyclability of CuO-AlOOH for 4-NP reduction.

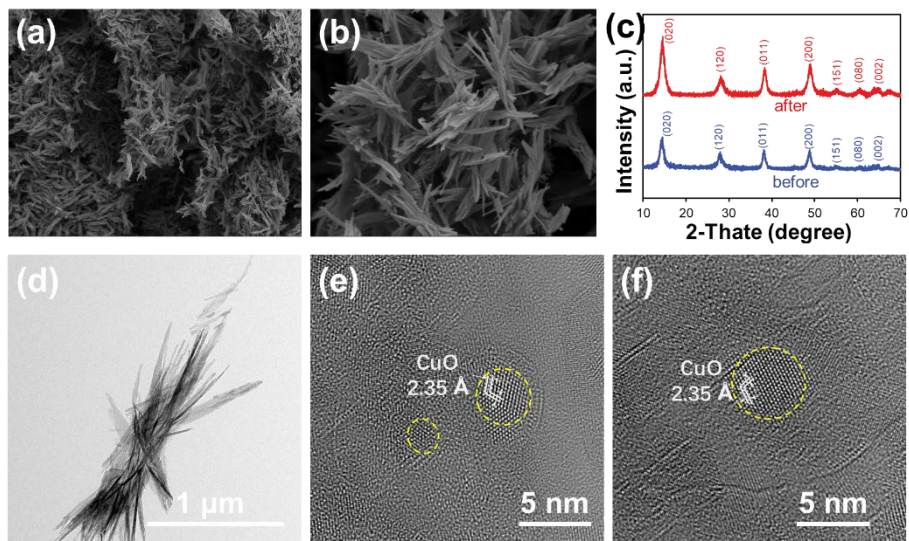

**Fig. S15.** (a, b) SEM images of retrieved CuO-AlOOH after the catalytic reaction. (c) The XRD patterns of CuO-AlOOH before and after the catalytic reaction. (d-f) TEM images of retrieved CuO-AlOOH after the catalytic reaction.

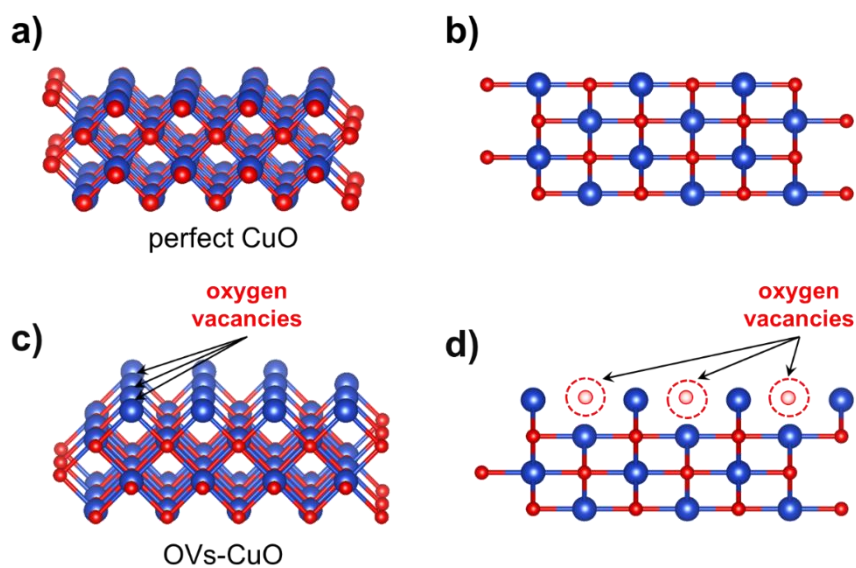

**Fig. S16.** (a, c) Front and (b, d) side view of perfect (a, b) CuO and (c, d) OV-CuO atomic model.

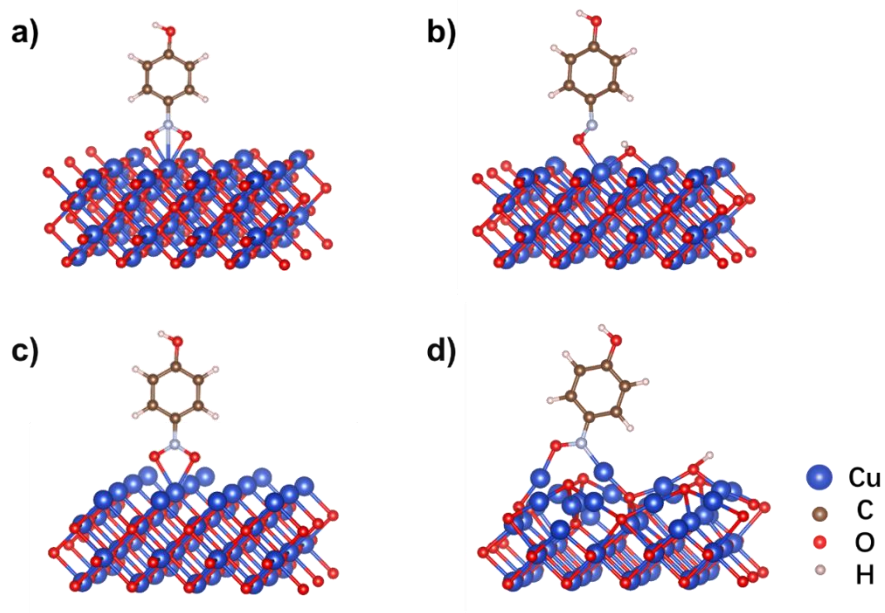

**Fig. S17.** (a) Atomic model of adsorption of 4-NP by perfect CuO. (b) The first hydrogenation step of 4-NP on perfect CuO. (c) Model of adsorption of 4-NP by OVs-CuO. (d) The first hydrogenation step of 4-NP on OVs-CuO.

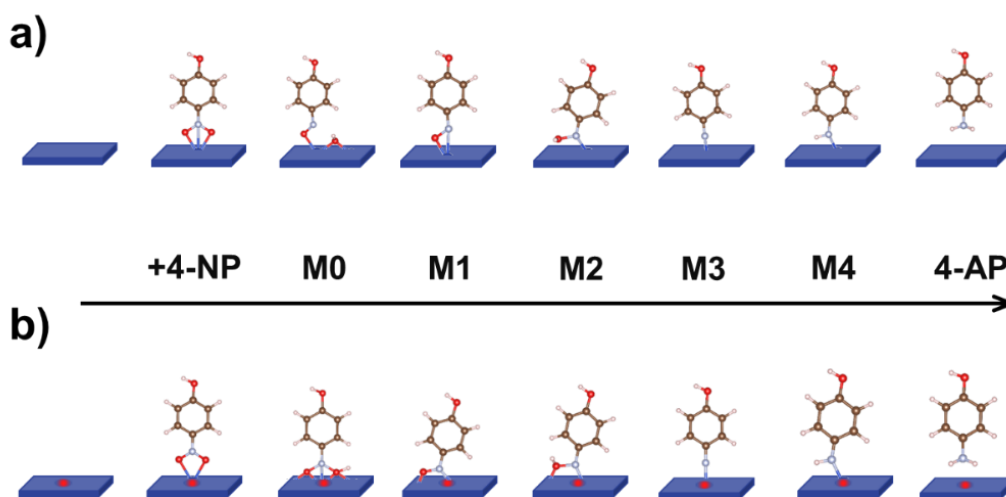

**Fig. S18.** Simplified model detail steps of adsorption and reduction of 4-NP by (a) perfect and (b) deficient CuO.
